# Supplementary material
Source: MDPI journal article supplement (https://www.mdpi.com/2071-1050/15/20/14711)

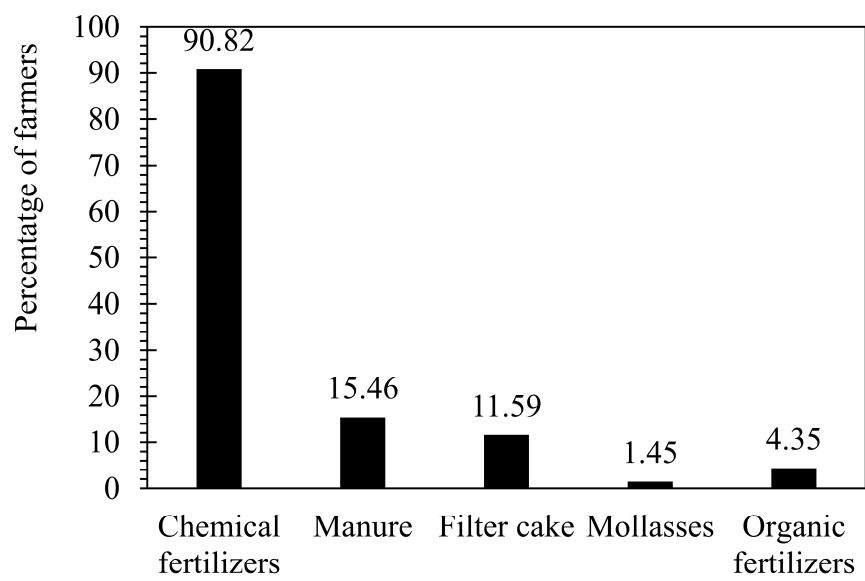

**Figure S1.** Percentage of sugarcane farmers applying various types of fertilizers.

Supplement: s1 [file s1]
